# Supplementary material for: The prevalence and potential fisheries consequences of Heterosporis sutherlandae in a Minnesota lake
Source: PLoS One. 2018 Jun 25;13(6):e0199580. doi: 10.1371/journal.pone.0199580 (PMC6016923; doi:10.1371/journal.pone.0199580)
Supplement: S1 Table — This dataset contains all of the field data from the yellow perch collected from Leech Lake. The first column is the number of fish collected. Column B is the date that each fish was collected. Column C refers to location captured (Fig 2). Column H and I are indications of whether a fish contained lesions caused by H. sutherlandae spores (Y) and/or if spores were detected under the microscope (Y). Column J refers to the classification of infection severity by the number of spores detected under the microscope (none (0 spores/2 minutes of inspection), light (<10 spores/ 2 min), moderate (10–100 spores/ 2 min), or heavy (>100 spores/ 2 min)). Columns K-N reference the presence of different life stages of the H. sutherlandae parasite (sporophorous vesicles are abbreviated as SPOV). The final two columns (O and P) reference photos of lesions or H. sutherlandae spores that are not included in this article. (XLSX) [file pone.0199580.s002.xlsx]

## Sheet: Main Data
Acession #	Date	Gill Net # or Seine Station	Length	Wieght	Age	Sex	Visual Detection	Micro Detection	Infection Type	SPOV	Sporophorocyst	Microspores	Macrospores	Micro Pic	Digi Pic
1	2004-09-08	GN9	194	96.2	5	F	N	N	None					N	N
2	2004-09-08	GN9	142	33.5	3	F	N	N	None					N	N
3	2004-09-08	GN9	221	131.9	5	F	Y	Y	Heavy	N	N	N	Y	Y3	N
4	2004-09-08	GN9	194	84.2	5	F	Y	Y	Moderate	N	N	N	Y	Y2	N
5	2004-09-08	GN9	175	57.5	5	M	N	N	None					N	N
6	2004-09-08	GN9	202	92.4	6	F	N	N	None					N	N
7	2004-09-08	GN9	243	199.8	6	F	N	N	None					N	N
8	2004-09-08	GN9	146	31.2	4	M	N	N	None					N	N
9	2004-09-08	GN9	204	97.9	5	F	N	N	None					Y3	N
10	2004-09-08	GN9	164	40.7	5	F	N	N	None					N	N
11	2004-09-08	GN9	162	38.7	5	F	N	N	None					N	N
12	2004-09-08	GN9	156	34.5	4	F	N	N	None					N	N
13	2004-09-08	GN9	223	160.4	6	F	Y	Y	Heavy	N	Y	Y	N	N	N
14	2004-09-08	GN9	198	82.6	5	M	Y	Y	Heavy	N	Y	Y	N	N	N
15	2004-09-08	GN9	162	48.6	4	F	N	N	None					N	N
16	2004-09-08	GN9	139	30.8	3	M	N	N	None					N	N
17	2004-09-08	GN9	185	57.6	5	F	N	N	None					N	N
18	2004-09-08	GN9	145	38.8	4	F	N	N	None					N	N
19	2004-09-08	GN9	206	109.8	6	F	N	N	None					N	N
20	2004-09-08	GN9	160	52.4	4	M	N	N	None					N	N
21	2004-09-07	GN7	139	28.3	3	F	N	N	None					N	N
22	2004-09-07	GN7	141	33.2	3	F	N	N	None					N	N
23	2004-09-07	GN7	219	141.3	6	F	N	N	None					N	N
24	2004-09-07	GN7	230	198.3	6	F	N	N	None					N	N
25	2004-09-07	GN7	166	52.5	5	F	N	N	None					N	N
26	2004-09-07	GN7	224	140.4	6	F	N	N	None					N	N
27	2004-09-07	GN7	224	172.6	6	F	N	N	None					N	N
28	2004-09-07	GN7	225	150.9	6	F	N	N	None					N	N
29	2004-09-07	GN7	225	154.5	6	F	Y	Y	Heavy	Y	Y	Y	Y	Y3	N
30	2004-09-07	GN7	149	33.5	4	M	N	N	None					N	N
31	2004-09-07	GN7	152	37.7	4	F	N	N	None					N	N
32	2004-09-07	GN7	150	39.6	4	F	N	N	None					N	N
33	2004-09-07	GN7	140	32.9	4	M	N	N	None					N	N
34	2004-09-07	GN7	156	36.9	4	F	N	N	None					N	N
35	2004-09-07	GN5	153	38.3	4	F	N	N	None					N	N
36	2004-09-07	GN5	161	51	4	F	N	N	None					N	N
37	2004-09-07	GN5	165	50.1	5	F	N	N	None					N	N
38	2004-09-07	GN5	168	53.4	5	M	N	N	None					N	N
39	2004-09-07	GN5	155	45.2	4	M	N	N	None					N	N
40	2004-09-07	GN5	154	42.2	4	F	N	N	None					N	N
41	2004-09-07	GN5	158	52.3	4	M	Y	Y	Moderate	N	Y	Y	N	Y	N
42	2004-09-07	GN5	152	40.8	4	M	N	N	None					N	N
43	2004-09-07	GN5	148	38.8	4	M	Y	Y	Moderate	N	N	Y	Y	N	N
44	2004-09-07	GN5	155	42.4	4	M	Y	Y	Moderate	N	N	Y	Y	N	N
45	2004-09-07	GN5	152	37.4	4	M	N	N	None					N	N
46	2004-09-07	GN5	162	47.4	4	F	N	N	None					N	N
47	2004-09-07	GN5	143	34.5	3	M	N	N	None					N	N
48	2004-09-07	GN5	167	51.1	5	F	N	N	None					N	N
49	2004-09-07	GN5	153	38.1	4	F	N	N	None					N	N
50	2004-09-07	GN5	198	94.7	5	F	N	N	None					N	N
51	2004-09-07	GN5	164	53.1	5	F	N	N	None					N	N
52	2004-09-07	GN5	201	85.3	5	F	Y	Y	Heavy	Y	Y	N	Y	Y3	N
53	2004-09-07	GN5	188	72.8	5	F	N	N	None					N	N
54	2004-09-07	GN5	147	35	4	M	N	N	None					N	N
55	2004-09-07	GN5	137	30.6	3	F	N	N	None					N	N
56	2004-09-07	GN5	133	26.8	3	M	N	N	None					N	N
57	2004-09-09	GN16	144	37.6	4	M	N	N	None					N	N
58	2004-09-09	GN16	145	37.8	4	F	N	N	None					N	N
59	2004-09-09	GN16	181	70.9	5	F	N	N	None					N	N
60	2004-09-09	GN16	142	35	3	F	N	N	None					N	N
61	2004-09-09	GN16	144	36.7	4	M	N	N	None					N	N
62	2004-09-09	GN16	156	43.4	4	M	Y	Y	Heavy	Y	Y	Y	Y	N	N
63	2004-09-09	GN16	144	39.3	4	M	N	N	None					N	N
64	2004-09-09	GN16	199	104.8	5	F	N	N	None					N	N
65	2004-09-09	GN16	153	56.3	4	F	N	N	None					N	N
66	2004-09-09	GN16	124	27.4	2	M	N	N	None					N	N
67	2004-09-09	GN16	173	69.7	5	M	N	N	None					N	N
68	2004-09-09	GN16	156	57.2	4	M	N	N	None					N	N
69	2004-09-09	GN16	147	40	4	M	N	N	None					N	N
70	2004-09-09	GN16	138	39.5	3	F	N	N	None					N	N
71	2004-09-09	GN16	136	35.1	3	M	N	N	None					N	N
72	2004-09-09	GN16	130	29.7	3	F	N	N	None					N	N
73	2004-09-09	GN16	147	46.3	3	F	N	N	None					N	N
74	2004-09-07	GN6	151	32.4	3	F	N	Y	Moderate	N	Y	Y	N	N	N
75	2004-09-09	GN15	129	25.8	2	F	N	N	None					N	N
76	2004-09-09	GN15	145	36.2	4	M	N	N	None					N	N
77	2004-09-09	GN15	142	32.5	3	F	N	N	None					N	N
78	2004-09-09	GN15	129	28.1	2	M	N	Y	Light	N	Y	N	Y	N	N
79	2004-09-09	GN15	154	40.1	4	M	N	N	None					N	N
80	2004-09-09	GN15	172	56.9	5	M	N	N	None					N	N
81	2004-09-09	GN15	204	131.7	6	F	N	N	None					N	N
82	2004-09-09	GN14	213	127	6	F	N	N	None					N	N
83	2004-09-09	GN14	247	221.7	6	M	N	N	None					N	N
84	2004-09-09	GN14	223	121.7	6	M	N	Y	Heavy	N	N	Y	Y	N	N
85	2004-09-09	GN14	253	225.2	7	F	N	Y	Heavy	N	N	Y	N	Y2	N
86	2004-09-09	GN14	281	312.8	7	F	N	N	None					N	N
87	2004-09-09	GN14	279	341.4	7	F	N	N	None					N	N
88	2004-09-09	GN14	286	321.6	7	M	N	N	None					N	N
89	2004-09-09	GN14	287	314.4	7	F	N	N	None					N	N
90	2004-09-08	GN9	180	74.4	5	M	N	N	None					N	N
91	2004-09-08	GN9	158	39.4	4	F	N	N	None					N	N
92	2004-09-08	GN9	142	31.2	3	M	N	N	None					N	N
93	2004-09-08	GN9	173	58.8	5	F	N	N	None					N	N
94	2004-09-08	GN9	136	26.5	3	F	N	N	None					N	N
95	2004-09-08	GN9	166	61.5	5	M	N	N	None					N	N
96	2004-09-08	GN9	207	120	6	F	N	N	None					N	N
97	2004-09-08	GN9	221	171	6	M	N	N	None					N	N
98	2004-09-08	GN9	202	114.5	5	F	N	N	None					N	N
99	2004-09-08	GN9	242	185.6	6	M	N	N	None					N	N
100	2004-09-08	GN9	201	120.1	6	F	N	N	None					N	N
101	2004-09-08	GN9	171	69	5	F	N	N	None					N	N
102	2004-09-08	GN9	221	133.8	6	F	N	N	None					N	N
103	2004-09-08	GN9	227	147.6	6	F	N	N	None					N	N
104	2004-09-08	GN9	152	35.4	4	F	N	N	None					N	N
105	2004-09-08	GN9	202	114.7	5	F	N	N	None					N	N
106	2004-09-08	GN9	257	249.2	7	F	N	N	None					N	N
107	2004-09-08	GN9	190	80.1	5	M	N	N	None					N	N
108	2004-09-08	GN9	168	50.2	4	F	Y	Y	Heavy	N	Y	N	Y	N	N
109	2004-09-08	GN9	223	155.2	6	F	N	Y	Moderate	N	Y	N	Y	N	N
110	2004-09-08	GN9	237	205.9	6	F	Y	Y	Heavy	N	Y	N	Y	N	N
111	2004-09-08	GN9	194	82.7	5	M	N	N	None					N	N
112	2004-09-08	GN9	151	25.7	3	M	N	N	None					N	N
113	2004-09-08	GN9	145	28.9	4	F	N	N	None					N	N
114	2004-09-08	GN9	143	24.7	3	F	N	N	None					N	N
115	2004-09-08	GN9	153	44.6	4	M	N	N	None					N	N
116	2004-10-08	Stoney Point	135	32.3	3	M	Y	Y	Heavy	N	Y	N	Y	N	N
117	2004-10-08	Stoney Point	140	35.1	4	F	N	N	None					N	N
118	2004-09-08	GN12	127	26.9	2	M	N	N	None					N	N
119	2004-09-08	GN12	200	103	5	M	Y	Y	Moderate	N	Y	Y	N	N	N
120	2004-09-08	GN12	238	177.3	6	F	N	N	None					N	N
121	2004-09-08	GN12	137	29.6	3	F	N	N	None					N	N
122	2004-09-07	GN6	145	33.7	4	M	N	N	None					N	N
123	2004-09-07	GN6	167	54.4	5	F	N	N	None					N	N
124	2004-09-07	GN6	137	30	3	F	N	N	None					N	N
125	2004-09-07	GN6	180	74.2	5	F	N	N	None					N	N
126	2004-09-07	GN6	143	32.4	3	M	N	N	None					N	N
127	2004-09-07	GN6	146	34.9	4	M	N	Y	Moderate	N	Y	Y	N	N	N
128	2004-09-07	GN6	155	40.8	4	F	N	N	None					N	N
129	2004-09-07	GN6	146	34.5	3	M	N	N	None					N	N
130	2004-09-08	GN9	140	25.1	3	F	N	Y	Light	N	Y	Y	N	N	N
131	2004-09-08	GN10	140	32.3	4	F	N	N	None					Y2	N
132	2004-09-07	GN6	142	33.2	3	F	N	N	None					N	N
133	2004-09-07	GN6	188	84.4	5	M	N	Y	Heavy	N	Y	Y	Y	N	N
134	2004-09-07	GN6	212	106.3	5	F	N	N	None					N	N
135	2004-09-07	GN6	185	76	5	F	N	N	None					N	N
136	2004-09-07	GN6	179	72.1	5	F	N	Y	Moderate	N	Y	Y	N	Y1	N
137	2004-09-07	GN6	236	170.6	6	F	N	N	None					N	N
138	2004-09-07	GN6	233	168.8	6	F	N	N	None					N	N
139	2004-09-07	GN6	182	68	5	F	N	N	None					N	N
140	2004-09-07	GN6	168	53.6	5	M	N	Y	Moderate	N	Y	Y	N	Y1	N
141	2004-09-07	GN6	144	36.2	4	F	N	Y	Moderate	N	Y	Y	N	N	N
142	2004-09-08	GN11	142	33.3	3	M	N	N	None					N	N
143	2004-09-08	GN11	136	29.4	3	M	N	N	None					N	N
144	2004-09-08	GN11	136	30.5	3	M	N	Y	None					N	N
145	2004-09-08	GN11	142	33.3	3	M	N	N	None					N	N
146	2004-09-08	GN11	136	29.4	3	M	N	N	None					N	N
147	2004-09-08	GN11	136	30.5	3	M	N	Y	Moderate	N	N	Y	N	N	N
148	2004-09-08	GN11	137	26.5	3	M	N	N	None					N	N
149	2004-09-08	GN11	144	36.6	4	F	N	N	None					N	N
150	2004-09-08	GN11	144	34.7	4	M	N	N	None					N	N
151	2004-09-08	GN11	129	27.8	2	M	N	N	None					N	N
152	2004-09-08	GN11	151	38.3	4	F	N	N	None					N	N
153	2004-09-08	GN11	134	27.8	3	M	N	N	None					N	N
154	2004-09-08	GN11	160	49.3	4	F	Y	Y	Moderate	N	N	Y	N	N	N
155	2004-09-08	GN11	138	30.2	3	M	N	N	None					N	N
156	2004-09-08	GN11	169	56.5	5	F	N	N	None					N	N
157	2004-09-08	GN11	232	184.9	6	F	N	N	None					N	N
158	2004-09-08	GN11	223	151.8	6	F	N	Y	Moderate	N	N	Y	N	N	N
159	2004-09-08	GN11	229	175.7	6	F	N	N	None					N	N
160	2004-09-08	GN11	204	91.3	6	M	Y	Y	Moderate	N	N	Y	N	Y3	N
161	2004-09-08	GN11	194	99.8	5	F	N	N	None					N	N
162	2004-09-08	GN11	189	76.6	5	M	N	N	None					N	N
163	2004-09-08	GN11	203	100.7	5	M	N	N	None					N	N
164	2004-09-07	GN8	156	41.7	4	M	N	Y	Heavy	N	N	Y	N	Y2	N
165	2004-09-07	GN8	152	36.7	4	M	Y	Y	Moderate	N	N	Y	N	N	N
166	2004-09-07	GN8	161	54.7	4	F	N	N	None					N	N
167	2004-09-07	GN8	157	38.7	4	M	N	N	None					N	N
168	2004-09-07	GN8	157	43.4	4	F	N	N	None					N	N
169	2004-09-07	GN8	158	41.2	4	M	N	N	None					N	N
170	2004-09-07	GN8	152	40.6	4	M	N	N	None					N	N
171	2004-09-07	GN8	156	39.7	4	F	Y	Y	Moderate	N	N	Y	N	N	N
172	2004-09-07	GN8	159	43.9	4	F	Y	Y	Heavy	Y	Y	Y	N	Y3	N
173	2004-09-07	GN8	163	45.4	4	F	N	Y	Light	N	Y	Y	N	N	N
174	2004-09-07	GN8	165	45.3	5	F	N	N	None					N	N
175	2004-09-07	GN8	148	37.9	4	F	Y	Y	Moderate	N	N	Y	N	N	N
176	2004-09-07	GN8	159	54.2	3	M	N	N	None					N	N
177	2004-09-07	GN8	156	42.6	4	F	N	N	None					N	N
178	2004-09-07	GN8	165	48.1	5	F	N	N	None					N	N
179	2004-09-07	GN8	161	47.6	4	M	N	N	None					N	N
180	2004-09-07	GN8	155	39.6	4	F	Y	Y	Heavy	N	Y	Y	N	Y1	N
181	2004-09-07	GN8	241	162.1	6	F	Y	Y	Moderate	N	Y	Y	N	N	N
182	2004-09-16	GN31	134	27.4	3	M	N	Y	Moderate	N	N	Y	N	N	N
183	2004-09-16	GN31	133	25.3	3	M	Y	Y	Moderate	N	N	Y	N	N	N
184	2004-09-16	GN31	186	76.5	5	F	Y	Y	Moderate	N	N	Y	N	N	N
185	2004-09-09	GN15	206	99.9	6	F	N	Y	Moderate	N	N	Y	N	Y4	N
186	2004-09-09	GN15	184	60.3	5	F	N	N	None					N	N
187	2004-09-09	GN15	197	100.5	5	F	N	N	None					N	N
188	2004-09-09	GN15	215	138.4	5	M	N	N	None					N	N
189	2004-09-09	GN15	253	172.6	7	F	N	N	None					N	N
190	2004-09-09	GN15	237	173.9	6	F	Y	Y	Moderate	N	Y	Y	N	N	N
191	2004-09-09	GN15	243	211	6	M	N	Y	Moderate	N	N	Y	N	N	N
192	2004-09-09	GN15	224	160.3	6	F	N	Y	Moderate	N	N	Y	N	N	N
193	2004-09-09	GN15	248	189.7	6	F	N	N	None					N	N
194	2004-09-09	GN15	250	209.7	6	F	N	N	None					N	N
195	2004-09-09	GN15	262	219.3	7	F	N	N	None					N	N
196	2004-09-09	GN15	177	71.3	4	M	N	Y	Moderate	N	N	Y	N	N	N
197	2004-09-09	GN15	139	30.6	3	M	N	N	None					N	N
198	2004-09-09	GN15	175	66.5	5	F	N	N	None					N	N
199	2004-09-09	GN15	229	149.3	6	F	N	N	None					N	N
200	2004-09-09	GN15	182	78.9	5	F	Y	Y	Heavy	N	Y	Y	N	N	N
201	2004-09-09	GN15	182	81.5	5	F	Y	Y	Heavy	N	Y	Y	N	N	N
202	2004-09-09	GN15	154	43.6	4	M	Y	Y	Moderate	N	N	Y	N	N	N
203	2004-09-09	GN15	179	73.9	5	M	N	N	None					N	N
204	2004-09-09	GN15	200	114	5	F	N	N	None					N	N
205	2004-09-09	GN15	148	32.8	4	M	N	N	None					N	N
206	2004-09-09	GN15	183	76	5	F	N	N	None					N	N
207	2004-09-09	GN15	182	76.3	5	M	Y	Y	Heavy	Y	Y	Y	N	N	N
208	2004-09-09	GN15	180	83.5	5	M	Y	Y	Moderate	N	N	Y	N	N	N
209	2004-09-09	GN15	147	36.6	3	F	N	N	None					N	N
210	2004-09-09	GN15	193	93.5	5	F	N	N	None					N	N
211	2004-09-09	GN15	151	44.7	4	F	N	N	None					N	N
212	2004-09-09	GN15	142	34	3	M	N	Y	Moderate	N	N	Y	N	N	N
213	2004-09-09	GN15	141	33.4	3	F	N	N	None					N	N
214	2004-09-09	GN15	164	57.4	5	F	N	N	None					N	N
215	2004-09-09	GN15	176	80.3	5	M	N	N	None					N	N
216	2004-09-09	GN15	171	70.4	4	F	N	N	None					N	N
217	2004-09-09	GN15	199	113.3	5	F	N	N	None					N	N
218	2004-09-09	GN15	206	109.3	6	F	Y	Y	Heavy	Y	Y	Y	Y	N	N
219	2004-09-09	GN15	201	98.8	5	F	N	Y	Moderate	N	Y	Y	N	N	N
220	2004-09-09	GN15	206	123.1	6	F	N	N	None					N	N
221	2004-09-09	GN15	188	94.9	5	M	N	Y	Moderate	N	N	Y	N	N	N
222	2004-09-09	GN15	176	71.1	5	M	N	N	None					N	N
223	2004-09-09	GN15	211	143.5	6	F	N	N	None					N	N
224	2004-09-09	GN15	167	56.1	5	F	N	N	None					N	N
225	2004-09-09	GN15	186	87.9	5	F	N	N	None					N	N
226	2004-09-09	GN15	201	112.6	5	F	N	N	None					N	N
227	2004-09-09	GN15	178	86.5	5	F	N	Y	Heavy	Y	Y	Y	Y	N	N
228	2004-09-08	GN10	192	84.9	5	F	N	N	None					N	N
229	2004-09-08	GN10	201	111.2	6	F	N	N	None					N	N
230	2004-09-08	GN10	184	74.8	5	F	N	Y	Moderate	Y	Y	Y	N	Y1	Y
231	2004-09-08	GN10	181	95.1	5	F	N	Y	Moderate	Y	Y	Y	Y	N	N
232	2004-09-08	GN10	184	90.9	5	F	Y	Y	Heavy	Y	Y	Y	Y	Y1	Y
233	2004-09-08	GN10	224	144.6	6	F	N	Y	Heavy	N	Y	Y	N	N	N
234	2004-09-08	GN10	188	93.5	5	F	Y	Y	Moderate	N	Y	Y	Y	Y1	Y
235	2004-09-08	GN10	223	167.3	6	F	N	Y	Moderate	N	Y	Y	N	N	N
236	2004-09-08	GN10	236	175.8	6	F	N	N	None					N	N
237	2004-09-08	GN10	233	160.6	6	F	Y	Y	Moderate	Y	Y	Y	Y	N	N
238	2004-09-08	GN10	285	339.2	7	F	Y	Y	Moderate	N	Y	Y	N	N	N
239	2004-09-08	GN10	261	225	7	F	Y	Y	Heavy	N	N	N	Y	Y1	Y
240	2004-09-08	GN10	268	295.3	7	M	N	Y	Moderate	N	N	Y	N	N	N
241	2004-09-08	GN10	260	255.1	7	F	N	N	None					N	N
242	2004-09-08	GN10	247	239.5	6	F	N	N	None					N	N
243	2004-09-14	GN26	138	30.6	3	F	Y	Y	Moderate	Y	Y	N	Y	N	N
244	2004-09-14	GN26	162	49.6	4	M	N	N	None					N	N
245	2004-09-14	GN26	135	27.5	3	M	N	Y	Moderate	N	Y	Y	N	N	N
246	2004-09-14	GN26	146	34.2	3	F	Y	Y	Moderate	N	Y	Y	N	N	N
247	2004-09-14	GN26	132	28.6	3	M	Y	Y	Moderate	N	Y	Y	N	N	N
248	2004-09-14	GN26	181	69.9	5	F	N	N	None					N	N
249	2004-09-14	GN26	132	35.6	3	M	Y	Y	Light	N	N	Y	N	N	N
250	2004-09-14	GN26	183	77	5	M	Y	Y	Moderate	N	Y	Y	Y	N	N
251	2004-09-14	GN26	172	64.2	5	F	N	N	None					N	N
252	2004-09-14	GN26	151	42	4	F	N	N	None					N	N
253	2004-09-14	GN26	144	36.5	4	M	N	Y	Light	N	N	Y	N	N	N
254	2004-09-14	GN26	136	31.4	3	M	N	N	None					N	N
255	2004-09-14	GN26	148	34.9	4	F	N	N	None					N	N
256	2004-09-26	Ottertail	38	0.7	0	X	N	N	None					N	N
257	2004-09-26	Ottertail	44	0.7	0	X	N	N	None					N	N
258	2004-09-26	5 Mile	48	1.3	0	X	N	N	None					N	N
259	2004-09-26	5 Mile	47	1.1	0	X	N	N	None					N	N
260	2004-10-08	Stoney Point	95	9	1	F	N	N	None					N	N
261	2004-10-08	Stoney Point	52	1.4	0	X	N	N	None					N	N
262	2004-10-08	Stoney Point	53	1.4	0	X	N	N	None					N	N
263	2004-10-08	Stoney Point	47	1.3	0	X	N	N	None					N	N
264	2004-10-08	Stoney Point	52	1.7	0	X	N	N	None					N	N
265	2004-10-08	Stoney Point	53	1.5	0	X	N	N	None					N	N
266	2004-10-08	Stoney Point	52	1.5	0	X	N	N	None					N	N
267	2004-10-08	Stoney Point	52	1.4	0	X	N	N	None					N	N
268	2004-10-08	Stoney Point	47	1	0	X	N	N	None					N	N
269	2004-10-08	Stoney Point	49	1.7	0	X	N	N	None					N	N
270	2004-10-08	Stoney Point	48	1.5	0	X	N	N	None					N	N
271	2004-10-08	Stoney Point	48	1.3	0	X	N	N	None					N	N
272	2004-10-08	Stoney Point	50	1.4	0	X	N	N	None					N	N
273	2004-10-08	Stoney Point	45	1.3	0	X	N	Y	Light	N	Y	Y	N	N	N
274	2004-10-08	Stoney Point	51	1.3	0	X	N	N	None					N	N
275	2004-10-08	Stoney Point	49	1.2	0	X	N	Y	Moderate	N	Y	Y	N	N	N
276	2004-10-08	Trader's Bay	50	1.3	0	X	N	Y	Heavy	N	Y	Y	N	N	N
277	2004-10-08	Trader's Bay	47	1.1	0	X	N	Y	Moderate	N	Y	Y	N	N	N
278	2004-10-08	Trader's Bay	52	1.3	0	X	N	N	None					N	N
279	2004-10-08	Trader's Bay	50	1.1	0	X	N	Y	Moderate	N	N	Y	N	N	N
280	2004-10-08	Trader's Bay	51	1.5	0	X	N	N	None					N	N
281	2004-10-08	Trader's Bay	45	1	0	X	N	N	None					N	N
282	2004-10-08	Trader's Bay	48	1	0	X	N	N	None					N	N
283	2004-10-08	Trader's Bay	51	1.3	0	X	N	Y	Moderate	N	N	Y	N	N	N
284	2004-10-08	Trader's Bay	50	1.3	0	X	N	N	None					N	N
285	2004-10-08	Trader's Bay	51	1.3	0	X	N	N	None					N	N
286	2004-09-12	GN19	147	36.8	4	M	Y	Y	Moderate	N	N	Y	N	N	N
287	2004-09-12	GN19	216	134.4	6	F	N	N	None					N	N
288	2004-09-12	GN19	201	90.7	5	F	N	N	None					N	N
289	2004-09-12	GN19	143	32.3	3	F	N	N	None					N	N
290	2004-09-12	GN19	199	95.3	5	F	N	N	None					N	Y
291	2004-09-12	GN19	173	56.6	5	F	N	N	None					N	N
292	2004-09-12	GN19	239	131.6	6	F	N	N	None					N	N
293	2004-09-12	GN19	220	119.6	5	F	N	N	None					N	N
294	2004-09-12	GN19	289	358	7	F	N	N	None					N	N
295	2004-09-12	GN19	223	140.5	6	F	N	N	None					N	N
296	2004-09-12	GN19	150	35.1	4	F	Y	Y	Heavy	Y	Y	Y	Y	Y2	Y
297	2004-09-12	GN19	206	111.7	6	F	N	N	None					N	N
298	2004-09-12	GN19	216	131.7	5	F	N	N	None					N	N
299	2004-09-12	GN19	203	113.8	5	F	Y	Y	Heavy	Y	Y	Y	Y	Y2	N
300	2004-09-12	GN19	300	383.3	7	F	N	N	None					N	N
301	2004-09-12	GN19	206	100.5	6	F	N	N	None					N	N
302	2004-09-12	GN19	202	108	5	M	N	Y	Moderate	N	N	Y	N	N	N
303	2004-09-12	GN19	233	163.8	6	F	Y	Y	Moderate	N	Y	Y	Y	N	N
304	2004-09-12	GN20	158	44.2	4	F	N	N	None					N	N
305	2004-09-12	GN20	144	35.1	4	F	N	N	None					N	N
306	2004-09-12	GN20	143	34.9	3	F	N	N	None					N	N
307	2004-09-12	GN20	152	48.2	4	F	N	N	None					N	N
308	2004-09-12	GN20	195	94.5	5	F	N	N	None					N	N
309	2004-09-12	GN20	142	34.7	3	F	N	N	None					N	N
310	2004-09-12	GN20	172	53.7	5	F	N	N	None					N	N
311	2004-09-12	GN20	209	105.7	6	F	N	N	None					N	N
312	2004-09-12	GN20	136	26.6	3	M	N	N	None					N	N
313	2004-09-12	GN20	201	93.9	6	F	Y	Y	Heavy	Y	Y	N	Y	N	N
314	2004-09-12	GN20	197	89.8	5	M	Y	Y	Moderate	Y	Y	Y	Y	N	N
315	2004-09-12	GN20	150	36.7	4	M	N	Y	Light	N	Y	Y	N	N	N
316	2004-09-12	GN20	152	37.6	4	M	N	Y	Light	N	Y	Y	N	N	N
317	2004-09-12	GN20	135	29.8	3	M	N	N	None					N	N
318	2004-09-12	GN20	134	24.3	3	M	N	N	None					N	N
319	2004-09-12	GN20	199	105.6	5	F	N	N	None					N	N
320	2004-09-12	GN20	292	376.6	7	F	Y	Y	Heavy	Y	Y	Y	Y	Y2	Y
321	2004-09-26	Ottertail	41	0.7	0	X	N	N	None					N	N
322	2004-09-26	Whipholt	72	3.6	1	M	N	Y	Moderate	N	N	N	Y	Y3	N
323	2004-09-26	Whipholt	52	1.4	0	X	N	Y	Moderate	N	N	N	Y	N	N
324	2004-09-26	Whipholt	54	1.5	0	X	N	N	None					N	N
325	2004-09-26	Whipholt	48	0.9	0	X	N	N	None					N	N
326	2004-09-26	Whipholt	57	2	0	X	N	N	None					N	N
327	2004-09-26	Whipholt	45	1.2	0	X	N	N	None					N	N
328	2004-09-26	Whipholt	51	1.2	0	X	N	N	None					N	N
329	2004-09-26	Whipholt	51	1.2	0	X	N	N	None					N	N
330	2004-10-08	Trader's Bay	43	0.8	0	X	N	N	None					N	N
331	2004-10-08	Trader's Bay	45	0.8	0	X	N	N	None					N	N
332	2004-10-08	Trader's Bay	49	1.2	0	X	N	Y	Light	Y	N	N	Y	N	N
333	2004-10-08	Trader's Bay	44	0.9	0	X	N	N	None					N	N
334	2004-10-08	Trader's Bay	43	0.9	0	X	N	N	None					N	N
335	2004-10-08	Trader's Bay	50	1.3	0	X	N	N	None					N	N
336	2004-10-08	Trader's Bay	47	1	0	X	N	N	None					N	N
337	2004-10-08	Trader's Bay	44	1.1	0	X	N	N	None					N	N
338	2004-10-08	Trader's Bay	49	1.2	0	X	N	N	None					N	N
339	2004-10-08	Trader's Bay	46	0.9	0	X	N	N	None					N	N
340	2004-10-08	Trader's Bay	48	1.1	0	X	N	N	None					N	N
341	2004-09-26	5 Mile	120	25.5	2	M	N	Y	Light	N	N	Y	N	N	N
342	2004-09-26	5 Mile	78	6.9	1	X	N	N	None					N	N
343	2004-09-26	5 Mile	83	6.9	1	X	N	N	None					N	N
344	2004-09-26	5 Mile	85	6.7	1	X	N	N	None					N	N
345	2004-09-26	5 Mile	93	8	1	X	N	N	None					N	N
346	2004-09-26	5 Mile	83	6	1	X	N	N	None					N	N
347	2004-10-08	Trader's Bay	89	8	1	M	Y	Y	Moderate	N	N	Y	N	N	N
348	2004-10-08	Trader's Bay	80	4.9	1	F	Y	Y	Moderate	N	Y	Y	Y	N	N
349	2004-09-26	5 Mile	43	1	0	X	N	N	None					N	N
350	2004-09-26	5 Mile	51	1.3	0	X	N	Y	Moderate	N	Y	Y	N	N	N
351	2004-09-26	5 Mile	52	1.4	0	X	N	N	None					N	N
352	2004-09-26	5 Mile	49	1.1	0	X	Y	Y	Moderate	N	Y	Y	N	N	N
353	2004-09-26	5 Mile	51	1.2	0	X	Y	Y	Moderate	Y	N	Y	N	N	N
354	2004-09-26	5 Mile	49	1.1	0	X	Y	Y	Moderate	Y	Y	Y	N	N	N
355	2004-09-26	5 Mile	52	1.2	0	X	N	N	None					N	N
356	2004-09-26	5 Mile	53	1.6	0	X	Y	Y	Moderate	Y	Y	Y	N	N	N
357	2004-09-26	5 Mile	52	1.3	0	X	N	N	None					N	N
358	2004-09-26	5 Mile	52	1.4	0	X	N	N	None					N	N
359	2004-09-26	5 Mile	55	1.6	0	X	Y	Y	Moderate	N	Y	Y	Y	N	N
360	2004-09-26	5 Mile	49	1.1	0	X	Y	Y	Moderate	Y	Y	Y	Y	N	N
361	2004-09-26	5 Mile	50	1.1	0	X	Y	Y	Moderate	Y	Y	Y	N	N	N
362	2004-09-26	5 Mile	52	1.3	0	X	Y	Y	Moderate	N	Y	Y	N	N	N
363	2004-09-26	5 Mile	48	1	0	X	N	N	None					N	N
364	2004-09-26	5 Mile	48	1.1	0	X	N	N	None					N	N
365	2004-09-26	5 Mile	51	1.3	0	X	N	N	None					N	N
366	2004-09-26	5 Mile	52	1.3	0	X	N	N	None					N	N
367	2004-09-26	5 Mile	51	1.4	0	X	N	N	None					N	N
368	2004-09-26	5 Mile	50	1.1	0	X	N	N	None					N	N
369	2004-09-26	5 Mile	51	1.2	0	X	N	N	None					N	N
370	2004-09-26	5 Mile	45	1.2	0	X	N	N	None					N	N
371	2004-09-26	5 Mile	51	1.3	0	X	Y	Y	Moderate	N	Y	Y	N	N	N
372	2004-09-26	5 Mile	52	1.2	0	X	N	N	None					N	N
373	2004-09-26	5 Mile	51	1.3	0	X	N	N	None					N	N
374	2004-09-26	5 Mile	51	1.3	0	X	N	N	None					N	N
375	2004-09-26	5 Mile	46	1	0	X	N	N	None					N	N
376	2004-09-26	Whipholt	81	5.6	1	M	N	N	None					N	N
377	2004-09-26	Whipholt	53	1.6	0	X	N	N	None					N	N
378	2004-09-26	Whipholt	55	1.8	0	X	N	N	None					N	N
379	2004-09-26	Whipholt	54	1.4	0	X	N	N	None					N	N
380	2004-09-26	Whipholt	52	1.4	0	X	N	N	None					N	N
381	2004-09-26	Whipholt	51	1.4	0	X	N	N	None					N	N
382	2004-09-26	Whipholt	52	1.4	0	X	N	Y	Light	N	Y	N	Y	N	N
383	2004-09-26	Whipholt	49	1.2	0	X	N	N	None					N	N
384	2004-09-26	Whipholt	52	1.4	0	X	N	N	None					N	N
385	2004-09-26	Whipholt	52	1.5	0	X	N	N	None					N	N
386	2004-09-26	Whipholt	53	1.4	0	X	N	N	None					N	N
387	2004-09-26	Whipholt	49	1.4	0	X	N	N	None					N	N
388	2004-09-26	Whipholt	52	1.5	0	X	N	Y	Moderate	Y	Y	Y	N	N	N
389	2004-09-26	Whipholt	48	1.2	0	X	N	N	None					N	N
390	2004-09-26	Whipholt	56	1.6	0	X	N	N	None					N	N
391	2004-09-26	Whipholt	54	1.3	0	X	N	N	None					N	N
392	2004-09-26	Whipholt	52	1.4	0	X	N	Y	Moderate	N	Y	Y	N	N	N
393	2004-09-26	Whipholt	53	1.5	0	X	N	Y	Moderate	N	Y	Y	N	N	N
394	2004-09-26	Whipholt	56	1.6	0	X	N	N	None					N	N
395	2004-09-26	Whipholt	54	1.4	0	X	N	N	None					N	N
396	2004-09-26	Whipholt	51	1.4	0	X	N	N	None					N	N
397	2004-09-26	Whipholt	50	1.3	0	X	N	N	None					N	N
398	2004-09-26	Whipholt	51	1.2	0	X	N	N	None					N	N
399	2004-09-26	Whipholt	52	1.5	0	X	N	Y	Moderate	Y	Y	Y	N	N	N
400	2004-09-26	Whipholt	50	1.3	0	X	N	Y	Moderate	N	Y	Y	N	N	N
Results
% Female	0.638514	% Visual Detection	0.1475				Infection by age	# per age group	# infected/age	%/age		Infection by sex	# of each	# per group	% infection
% Male	0.361486	% Microscopic Detection	0.2775				0	99	24	0.2424		Male	107	40	0.3738
Ave. Length	144.623	% Light	0.1				1	10	3	0.3		Female	189	47	0.2487
Ave. Weight	61.9047	% Moderate	0.645455				2	6	2	0.3333		X (YOY) or NO Sex	104	24	0.2308
Ave. Age	3.37	% Heavy	0.254545				3	53	13	0.2453
		Of those Infected…% with…					4	77	22	0.2857
		SPOV	0.227273				5	86	24	0.2791
		Sporophorocyst	0.645455				6	54	18	0.3333
		Microspores	0.863636				7	15	5	0.3333
		Macrospores	0.327273
Infection by net site	# per net	# per net infected	% Infection					Age 1	Age 2	Age 3	Age 4	Age 5	Age 6	Age 7
GN5	22	4	0.1818				Males
GN6	19	6	0.3158				Yes	2	2	9	12	10	3	1
GN7	14	1	0.0714				No	0	3	20	24	14	3	1
GN8	18	8	0.4444				Females
GN9	47	8	0.1702				Yes	1	0	4	9	14	15	4
GN10	16	10	0.625				No	1	1	20	32	48	34	9
GN11	22	5	0.2273
GN12	4	1	0.25				% Infection by age and sex
GN14	8	2	0.25					Age 1	Age 2	Age 3	Age 4	Age 5	Age 6	Age 7
GN15	50	16	0.32				Males
GN16	17	1	0.0588				Yes	1	0.4	0.31	0.333	0.416	0.5	0.5
GN19	18	5	0.2778				No	0	0.6	0.69	0.667	0.583	0.5	0.5
GN20	17	5	0.2941				Females
GN26	13	7	0.5385				Yes	0.5	0	0.2	0.219	0.226	0.306	0.307
GN31	3	3	1				No	0.5	1	0.8	0.781	0.774	0.694	0.693
Stoney Point	18	3	0.1667
Ottertail	3	0	0
5 Mile	35	11	0.3143
Trader's Bay	23	7	0.3043
Whipholt	33	8	0.2424
